# Supplementary material for: Feasibility and Preliminary Efficacy of the Eating Advice to Students (EATS) Brief Web-Based Nutrition Intervention for Young Adult University Students: A Pilot Randomized Controlled Trial
Source: MDPI journal article supplement (doi:10.3390/nu11040905), 2019-04-23
Supplement: s1 [file s1]

**Table S1** Primary and secondary outcome changes in young adult university students (n=106) who completed the Eating Advice To Students (EATS) brief web-based nutrition intervention pilot RCT from baseline to 3 months

| Outcome                                                                 | Mean change from baseline to 3-months (95%CI) |              |                      |              | Mean difference between groups (95% CI) | Group*Time p-value | Effect size |
|-------------------------------------------------------------------------|-----------------------------------------------|--------------|----------------------|--------------|-----------------------------------------|--------------------|-------------|
|                                                                         | Intervention (n=42 or 50)                     | p-value      | Control (n=50 or 54) | p-value      |                                         |                    |             |
| Diet quality (ARFS) <sup>a</sup>                                        | -0.3 (-2.4, 1.7)                              | 0.750        | 1.1 (-0.8, 2.9)      | 0.269        | -1.4 (-4.2, 1.4)                        | 0.326              | -0.16       |
| Fruit (ARFS sub-scale score) <sup>a</sup>                               | 0.1 (-0.6, 0.8)                               | 0.731        | -0.1 (-0.7, 0.5)     | 0.705        | 0.2 (-0.7, 1.2)                         | 0.611              | 0.09        |
| Fruit (grams/day) <sup>a</sup>                                          | -4.8 (-53.3, 43.7)                            | 0.846        | 4.7 (-39.8, 49.1)    | 0.837        | -9.4 (-75.2, 56.3)                      | 0.778              | -0.05       |
| Fruit (grams/day) (adjusted model) <sup>a, b</sup>                      | 20.9 (-14.6, 56.4)                            | 0.248        | 4.7 (-27.5, 36.8)    | 0.777        | 16.3 (-31.6, 64.2)                      | 0.505              | 0.11        |
| % energy from fruit                                                     | 0.2 (-1.4, 1.8)                               | 0.812        | 0.2 (-1.3, 1.6)      | 0.827        | 0.03 (-2.1, 2.2)                        | 0.978              | 0.01        |
| Vegetable (ARFS sub-scale score) <sup>a</sup>                           | -0.2 (-1.3, 1.0)                              | 0.744        | 0.8 (-0.2, 1.8)      | 0.135        | -1.0 (-2.5, 0.6)                        | 0.211              | -0.22       |
| Vegetable (grams/day) <sup>a</sup>                                      | 17.4 (-21.3, 56.1)                            | 0.378        | -10.7 (-46.1, 24.8)  | 0.556        | 28.1 (-24.4, 80.6)                      | 0.294              | 0.18        |
| % energy from vegetables <sup>a</sup>                                   | 0.3 (-0.9, 1.4)                               | 0.650        | 0.4 (-0.7, 1.4)      | 0.497        | -0.1 (-1.6, 1.4)                        | 0.900              | -0.02       |
| % energy from discretionary foods <sup>a</sup>                          | -3.0 (-5.8 -0.2)                              | <b>0.033</b> | 1.6 (-0.9, 4.2)      | 0.212        | -4.6 (-8.4, -0.9)                       | <b>0.016</b>       | -0.37       |
| QLESQ total score <sup>a</sup>                                          | 0.2 (-1.8, 2.1)                               | 0.870        | -0.2 (-2.0, 1.7)     | 0.859        | 0.3 (-2.3, 3.0)                         | 0.810              | 0.05        |
| WHO-5 score <sup>a</sup>                                                | 0.1 (-0.9, 1.2)                               | 0.797        | -0.6 (-1.6, 0.5)     | 0.272        | 0.7 (-0.8, 2.2)                         | 0.343              | 0.17        |
| <i>Below categorical variables presented as odds ratio <sup>c</sup></i> |                                               |              |                      |              |                                         |                    |             |
| Breakfast (frequency consumed) <sup>a</sup>                             | 1.3 (0.3, 5.8)                                | 0.734        | 7.1 (1.6, 31.4)      | <b>0.010</b> | 0.2 (0.02, 1.5)                         | 0.109              | -0.41       |
| Alcohol (quantity consumed) <sup>d</sup>                                | 1.5 (0.6, 3.7)                                | 0.430        | 2.7 (1.1, 6.6)       | <b>0.035</b> | 0.5 (0.2, 2.0)                          | 0.357              | 0.30        |

|                                                                        |                 |              |                |              |                 |              |       |
|------------------------------------------------------------------------|-----------------|--------------|----------------|--------------|-----------------|--------------|-------|
| Fruit self-efficacy (confidence score) <sup>d</sup>                    | 0.8 (0.3, 1.9)  | 0.605        | 0.3 (0.1, 0.6) | <b>0.002</b> | 3.1 (0.9, 10.6) | 0.065        | 0.27  |
| Vegetables self-efficacy (confidence score) <sup>d</sup>               | 1.1 (0.5, 2.4)  | 0.846        | 0.7 (0.3, 1.6) | 0.435        | 1.5 (0.5, 4.4)  | 0.501        | 0.09  |
| Takeaway foods self-efficacy (confidence score) <sup>d</sup>           | 0.6 (0.2, 1.3)  | 0.191        | 0.6 (0.3, 1.2) | 0.163        | 1.0 (0.3, 3.0)  | 0.974        | 0.00  |
| EDNP snack foods self-efficacy (confidence score) <sup>d</sup>         | 0.7 (0.3, 1.5)  | 0.341        | 1.3 (0.6, 2.7) | 0.541        | 0.5 (0.2, 1.6)  | 0.267        | -0.15 |
| Sugar sweetened drinks self-efficacy (confidence score) <sup>d,e</sup> | 0.5 (0.2, 1.5)  | 0.233        | 0.7 (0.3, 1.7) | 0.449        | 0.7 (0.2, 2.8)  | 0.670        | -0.07 |
| Alcohol self-efficacy (confidence score) <sup>d</sup>                  | 0.1 (0.04, 0.5) | <b>0.002</b> | 0.9 (0.3, 2.6) | 0.855        | 0.2 (0.03, 0.8) | <b>0.023</b> | -0.45 |
| Breakfast self-efficacy (confidence score) <sup>d</sup>                | 0.5 (0.2, 1.4)  | 0.187        | 1.0 (0.4, 2.5) | 0.937        | 0.5 (0.1, 2.1)  | 0.364        | -0.16 |

ARFS, Australian Recommended Food Score; EDNP, Energy-Dense Nutrient Poor; QLESQ, Quality of Life, Enjoyment & Satisfaction Questionnaire; WHO-5, World Health Organization-Five Well-being Index. <sup>a</sup> n=42 for intervention group and n=50 for control group (i.e. those who completed the Australian Eating Survey Food Frequency Questionnaire at follow up) <sup>b</sup> Adjusted model with n=1 intervention participant removed from analysis due to outlier (1278 grams/day at baseline and 218 grams/day at follow-up). <sup>c</sup> Categorical variables are presented as OR of moving up a category (i.e. desirable direction), with the exception of alcohol intake which is odds of moving down a category. <sup>d</sup> n=50 for intervention group and n=54 for control group (i.e. those who completed the other survey questions at follow up) <sup>e</sup> Proportional odds assumption not met for this model, however alternative modelling did not change the result or interpretation

**Table S2** Primary and secondary outcome changes in young adult university students (n=78) who reported plausible energy intake at baseline in the Eating Advice To Students (EATS) brief web-based nutrition intervention pilot RCT from baseline to 3 months

| Outcome                      | Mean change from baseline to 3-months (95%CI) |         |                    |         | Mean difference between groups (95% CI) | Group*Time p-value | Effect size (Cohen's <i>d</i> ) |
|------------------------------|-----------------------------------------------|---------|--------------------|---------|-----------------------------------------|--------------------|---------------------------------|
|                              | Intervention (n=39)                           | p-value | Control (n=39)     | p-value |                                         |                    |                                 |
| Diet quality (ARFS)          | 0.6 (-1.7, 3.0)                               | 0.587   | 0.2 (-1.9, 2.3)    | 0.843   | 0.4 (-2.7, 3.6)                         | 0.791              | 0.05                            |
| Fruit (ARFS sub-scale score) | 0.4 (-0.4, 1.1)                               | 0.373   | -0.1 (-0.8, 0.6)   | 0.765   | 0.5 (-0.6, 1.5)                         | 0.392              | 0.18                            |
| Fruit (grams/day)            | 12.7 (-33.4, 58.8)                            | 0.589   | 10.0 (-32.5, 52.5) | 0.646   | 2.8 (-60.0, 65.5)                       | 0.931              | 0.02                            |
| % energy from fruit          | 0.9 (-0.7, 2.5)                               | 0.289   | 1.1 (-0.4, 2.7)    | 0.139   | -0.3 (-2.5, 2.0)                        | 0.818              | -0.06                           |

|                                                                         |                    |              |                     |       |                     |              |       |
|-------------------------------------------------------------------------|--------------------|--------------|---------------------|-------|---------------------|--------------|-------|
| Vegetable (ARFS sub-scale score)                                        | 0.2 (-1.1, 1.6)    | 0.745        | 0.3 (-1.0, 1.5)     | 0.662 | -0.1 (-1.9, 1.8)    | 0.954        | -0.01 |
| Vegetable (grams/day)                                                   | 14.2 (-33.3, 61.9) | 0.556        | -30.0 (-74.1, 14.1) | 0.182 | 44.3 (-20.5, 109.2) | 0.180        | 0.28  |
| % energy from vegetables                                                | 0.5 (-0.7, 1.8)    | 0.399        | -0.1 (-1.2, 1.1)    | 0.915 | 0.6 (-1.1, 2.3)     | 0.489        | 0.13  |
| % energy from discretionary foods                                       | -4.1 (-7.8, -0.5)  | <b>0.027</b> | 1.6 (-1.8, 5.0)     | 0.347 | -5.7 (-10.7, -0.8)  | <b>0.024</b> | -0.45 |
| <i>Below categorical variables presented as odds ratio <sup>b</sup></i> |                    |              |                     |       |                     |              |       |
| Breakfast (frequency consumed)                                          | 1.1 (0.1, 10.0)    | 0.914        | 4.5 (0.8, 25.6)     | 0.091 | 0.3 (0.02, 4.2)     | 0.334        | -0.33 |

ARFS, Australian Recommended Food Score. Plausible energy reporters were identified from baseline energy intake using the Goldberg cutoffs [1], with basal metabolic rate calculated using the Schofield equation [2] and a physical activity level of 1.55 used for all participants. Participants with an energy intake: basal metabolic rate <0.97 were classified as under-reporters and those with energy intake: basal metabolic rate >2.48 as over-reporters. There was no significant difference in the number of plausible reporters between groups (intervention n=39, control n=39).

## References

1. Black, A.E. Critical evaluation of energy intake using the goldberg cut-off for energy intake: Basal metabolic rate. A practical guide to its calculation, use and limitations. *Int J Obes Relat Metab Disord* **2000**, *24*, 1119-1130.
2. Schofield, W.N. Predicting basal metabolic rate, new standards and review of previous work. *Hum Nutr Clin Nutr* **1985**, *39 Suppl 1*, 5-41.
